# Supplementary material
Source: PubMed Central journal article supplement (PMC5803427)
Supplement: NIHMS916595-supplement-Supplementary_Tables_and_Figures.pdf [file NIHMS916595-supplement-Supplementary_Tables_and_Figures.pdf]

**POLYGENIC RISK SCORE OF SPORADIC LATE ONSET ALZHEIMER DISEASE REVEALS A SHARED  
ARCHITECTURE WITH THE FAMILIAL AND EARLY ONSET FORMS**

**Supplementary Information**

**Supplementary Table 1: SNPs and Odd ratios employed to derive the PRS**

| Reported SNP | Tagging SNP | r <sup>2</sup> | D'   | Chr | Position  | Gene              | OR   |
|--------------|-------------|----------------|------|-----|-----------|-------------------|------|
| rs6656401    | rs2093761   | 0.9            | 0.97 | 1   | 207786542 | CR1               | 1.25 |
| rs6733839    | rs7561528   | 0.4            | 0.70 | 2   | 127889637 | BIN1              | 1.24 |
| rs35349669   |             |                |      | 2   | 234068476 | INPP5D            | 1.12 |
| rs111418223  |             |                |      | 6   | 32578530  | HLA-DRB5-HLA-DRB1 | 1.11 |
| rs10948363   |             |                |      | 6   | 47487762  | CD2AP             | 1.15 |
| rs2718058    |             |                |      | 7   | 37841534  | NME8              | 0.90 |
| rs1476679    |             |                |      | 7   | 100004446 | ZCWPW1            | 0.87 |
| rs11771145   |             |                |      | 7   | 143110762 | EPHA1             | 0.86 |
| rs28834970   |             |                |      | 8   | 27195121  | PTK2B             | 1.15 |
| rs9331896    | rs11136000  | 0.9            | 0.97 | 8   | 27464519  | CLU               | 0.82 |
| rs10838725   |             |                |      | 11  | 47557871  | CELF1             | 1.12 |
| rs983392     |             |                |      | 11  | 59923508  | MS4A6A            | 0.86 |
| rs10792832   |             |                |      | 11  | 85867875  | PICALM            | 0.82 |
| rs11218343   |             |                |      | 11  | 121435587 | SORL1             | 0.69 |
| rs17125944   |             |                |      | 14  | 53400629  | FERMT2            | 1.21 |
| rs4147929    |             |                |      | 19  | 1063443   | ABCA7             | 1.22 |
| rs3865444    |             |                |      | 19  | 51727962  | CD33              | 0.91 |
| rs7274581    | rs927174    | 0.9            | 1.00 | 20  | 55020689  | CASS4             | 0.84 |

**Supplemental Table 2. Quantile regression for Polygenic Risk Score and the Age at Onset for the combined early and late onset sporadic cohorts.** Panel A: Minimal model that corrects for sex and study that ascertained the participants. Panel B: Extended models that corrects for the effects of APOE alleles.

**Minimal Model**

| Quantile | Effect* | SE   | <i>p</i> -value | Variable |
|----------|---------|------|-----------------|----------|
| 1        | -11.83  | 4.10 | 3.94E-03        | PRS      |
| 2        | -12.27  | 3.56 | 5.88E-04        | PRS      |
| 3        | -9.53   | 3.16 | 2.58E-03        | PRS      |
| 4        | -9.37   | 3.80 | 1.38E-02        | PRS      |
| 5        | -8.73   | 4.04 | 3.06E-02        | PRS      |

**Extended Model**

| Quantile | Effect* | SE   | <i>p</i> -value | Variable |
|----------|---------|------|-----------------|----------|
| 1        | -13.89  | 4.12 | 7.63E-04        | PRS      |
| 1        | -12.63  | 2.76 | 5.29E-06        | APOE     |
| 2        | -9.59   | 3.36 | 4.33E-03        | PRS      |
| 2        | -17.78  | 2.40 | 2.37E-13        | APOE     |
| 3        | -10.91  | 2.91 | 1.89E-04        | PRS      |
| 3        | -22.06  | 2.03 | <1.00E-16       | APOE     |
| 4        | -4.89   | 3.46 | 1.58E-01        | PRS      |
| 4        | -25.68  | 2.57 | <1.00E-16       | APOE     |
| 5        | -8.97   | 3.76 | 1.72E-02        | PRS      |
| 5        | -28.04  | 2.80 | <1.00E-16       | APOE     |

The effect display is the months associated per unit of SD

**Supplemental Table 3:** Association results of the logistic regression models for Polygenic Risk Scores for the entire range of PRS derived for each of the cohorts and compared to non-demented participants

| <b>Cohort</b>                     | <b>PRS<br/>(model 1)</b> |                       | <b>PRS w/APOE<br/>effects<br/>(model 2)</b> |                        | <b>PRS APOE<br/>corrected<br/>(model 3)</b> |                       |
|-----------------------------------|--------------------------|-----------------------|---------------------------------------------|------------------------|---------------------------------------------|-----------------------|
|                                   | OR                       | <i>p-value</i>        | OR                                          | <i>p-value</i>         | OR                                          | <i>p-value</i>        |
| Autosomal Dominant Early Onset AD | 1.1                      | $5.52 \times 10^{-1}$ | 0.99                                        | $9.03 \times 10^{-1}$  | 1.25                                        | $1.94 \times 10^{-1}$ |
| Sporadic Early Onset AD           | 2.03                     | $1.85 \times 10^{-6}$ | 1.92                                        | $3.65 \times 10^{-36}$ | 2.01                                        | $1.38 \times 10^{-5}$ |
| Familial Late Onset AD            | 1.77                     | $1.27 \times 10^{-8}$ | 2.08                                        | $2.19 \times 10^{-48}$ | 2.08                                        | $1.16 \times 10^{-7}$ |
| Sporadic Late Onset AD            | 1.48                     | $6.05 \times 10^{-5}$ | 1.68                                        | $2.21 \times 10^{-39}$ | 1.51                                        | $6.98 \times 10^{-5}$ |

**Supplemental Table 4:** Association results of the logistic regression models for extreme tertiles of the Polygenic Risk Scores derived for the subjects not included in the IGAP study compared to non-demented participants

| <b>Cohort</b>          | <b>PRS<br/>(model 1)</b> |                       | <b>PRS APOE<br/>corrected<br/>(model 2)</b> |                       | <b>PRS w/APOE effects<br/>(model 3)</b> |                       |
|------------------------|--------------------------|-----------------------|---------------------------------------------|-----------------------|-----------------------------------------|-----------------------|
|                        | OR                       | <i>p-value</i>        | OR                                          | <i>p-value</i>        | OR                                      | <i>p-value</i>        |
|                        | Familial Late Onset AD   | 1.7                   | $5.53 \times 10^{-3}$                       | 1.81                  | $3.60 \times 10^{-3}$                   | 6.49                  |
| Sporadic Late Onset AD | 1.22                     | $3.27 \times 10^{-2}$ | 1.23                                        | $3.58 \times 10^{-2}$ | 3.79                                    | $7.10 \times 10^{-3}$ |

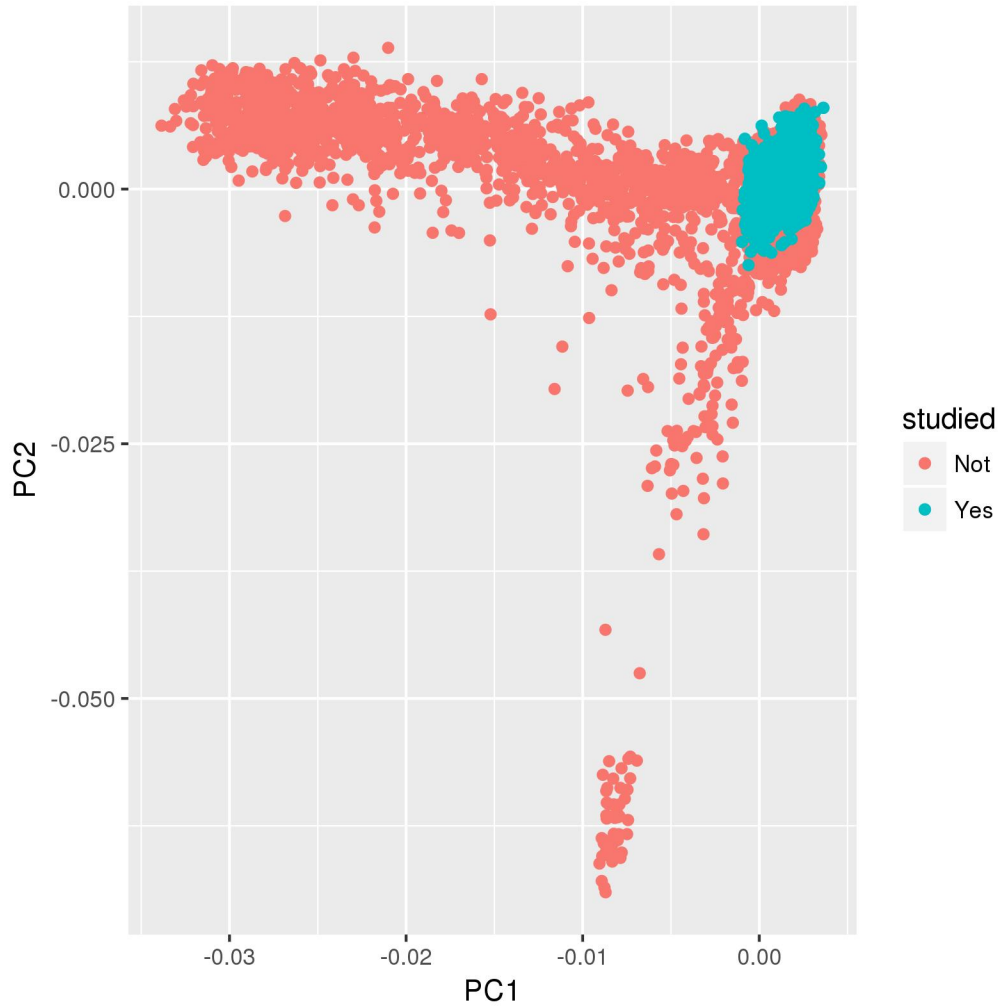

**Supplementary Figure 1:** Population stratification. We calculated the principal component factors for each sample to confirm the ethnicity of the samples (blue: samples included in the analysis)

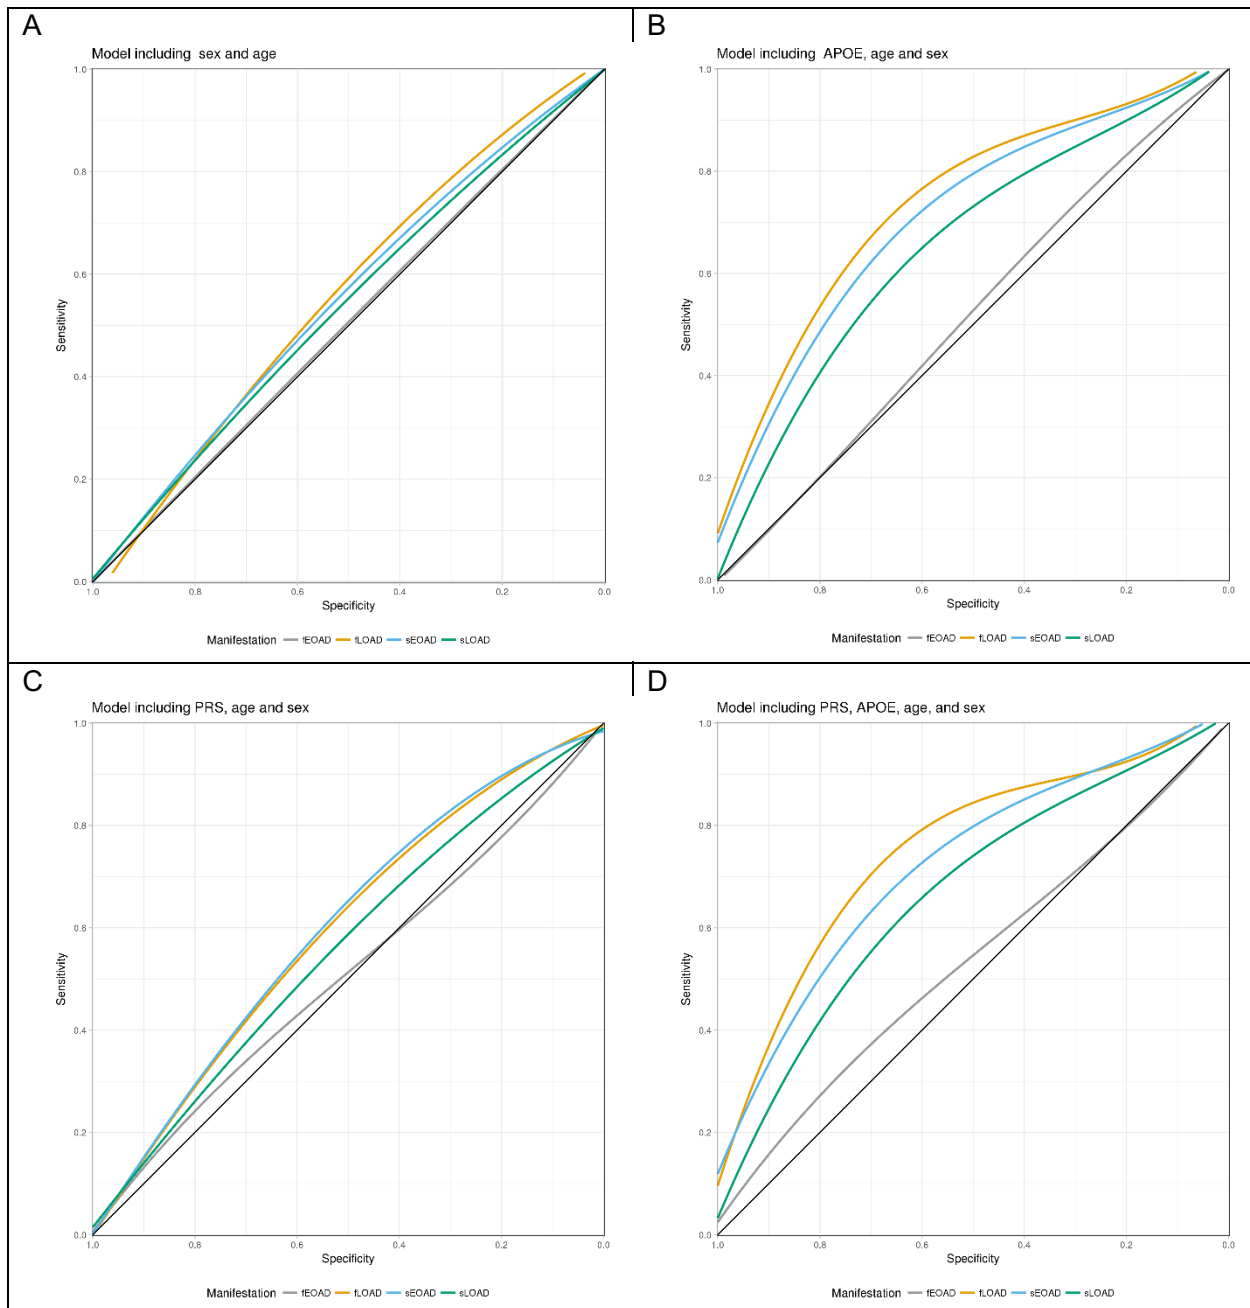

**Supplementary Figure 2. ROC curves for the distinct datasets using alternative models.** A: Model includes gender, and age (for the late-onset dataset). B) Extends previous model including the effect conferred by *APOE* genotypes. C) Extends the model in (A) including the PRS that includes the GWAS loci but not *APOE*. D) Extends the model in (A) including both *APOE* and PRS effects. Please refer to Supplementary Figure 4 for the ROC curves of model 2 stratified by *APOE* e4 alleles.

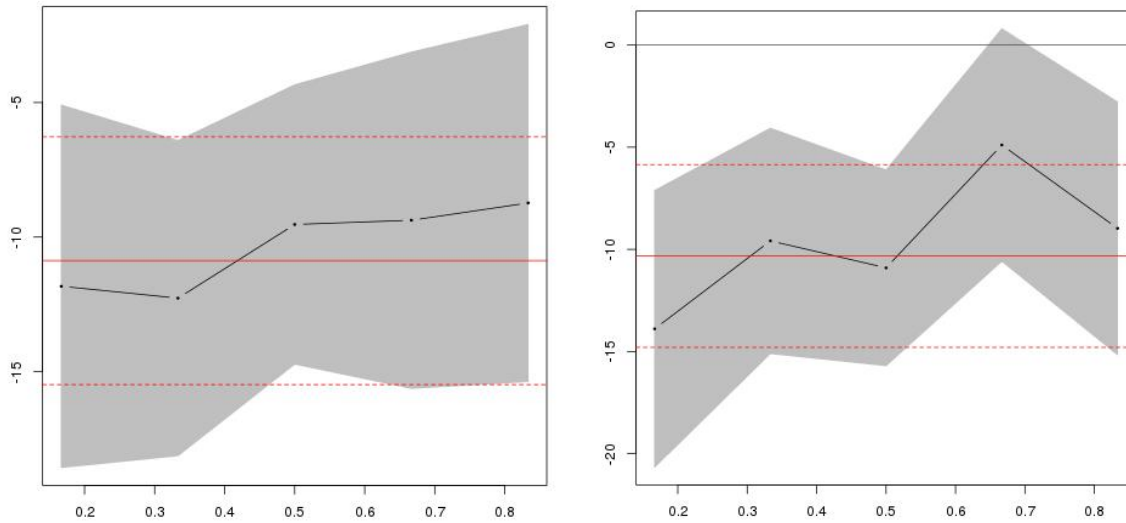

**Supplementary Figure 3. Quintile (5-quantile) regression estimates for the Polygenic Risk Score and the Age at Onset for the combined early- and late-onset sporadic cohorts.** The solid red line represents the estimates of calculated by the Ordinary Least Square method, and the dashed red lines the 95% confidence interval. Left Panel: Minimal model that corrects for the sex and study that ascertained the participant. Right Panel: Extended model that also correct for the risk conferred by *APOE* genotypes



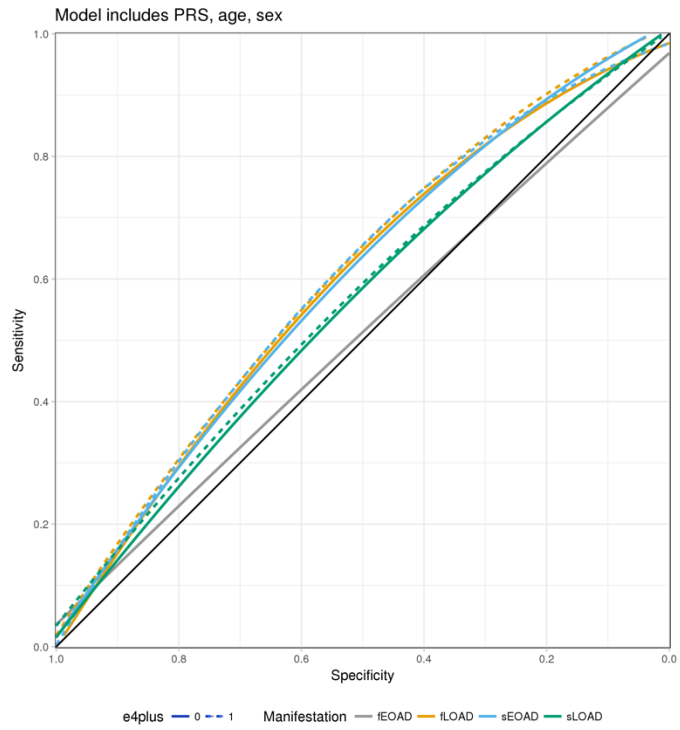

**Supplemental Figure 4: ROC curves representing the sensitivity and specificity of the models including PRS, gender and age (for the late-onset datasets) stratified APOE e4 carrier status.**

## Supplementary Information.

R code employed to evaluate the statistical significance of the association of the Polygenic Risk Score. We also include R code to generate toy datasets to allow the initial evaluation of the test. The code is also available in plain text format (file PRS.r)

```
# test.GRS: Evaluates the Odd ratios utilizing logistic regression and quantiles for
the Polygenic risk scores
# Parameters
#   data: dataframe containing the phenotypic and polygenic risk score calculated
for each individual
#       (e.g cohort, score, gender, age.test (either Age at Onset for cases or
Age of Last Assessment for controls)
#   variable: Indicates which column of the dataset "data" describes to which
cohort the samples are assigned (e.g. "cohort" )
#   cohort1: Indicates the first cohort which is being compared (e.g. a value
"Sporadic EO" )
#   cohort2: Indicates the second cohort which is being compared (e.g. a value
"Control" )
#   score_var: Indicates which column of the dataframe "data" contains the PRS
calculated for each subject
#   ntiles: Refers to the number of quantiles (either 3 or 4) to use
# Returns:
# Example test.GRS(database,"cohort","Sporadic Early
Onset","Control","Log_OR_Score",ntiles=3)
test.GRS = function ( data, variable, cohort1, cohort2, score_var, ntiles=3,
verbose=T) {

  sel = data[,variable] %in% c( cohort1, cohort2)
  data.test = data[sel,]
  data.test$test = data.test[,variable]
  data.test$riskScore = data.test[,score_var]

  if (verbose) {
    cat( sprintf( "Cohorts %s vs. %s\n", cohort1, cohort2) )
    print( table( data.test$test) )
  }
  data.test <- data.test[!is.na(data.test$riskScore),]
  data.test$quant = NA
  if ( ntiles == 3 ) {
    q = quantile(data.test$riskScore, probs=c( 0, 33, 66, 100)/100, na.rm = TRUE)
    data.test[data.test$riskScore <= q[2],]$quant = 0
    data.test[data.test$riskScore >= q[3],]$quant = 1
  }
  else {
    q = quantile(data.test$riskScore, probs=c( 0, 25, 50, 75, 100)/100, na.rm = TRUE)
    data.test[data.test$riskScore <= q[2],]$quant = 0
    data.test[data.test$riskScore >= q[4],]$quant = 1
  }
  cat( "\n")
  cat( sprintf( "Test the basic PRS model %s vs. %s. Quantiles=%i\n", cohort1,
cohort2, ntiles ) )
  m = glm(test == cohort1 ~ quant , family = binomial(link='logit'), data=data.test)
  dump.model( m)
  if ( verbose ) {
    print(summary(m))
  }
  cat( sprintf( "Test the PRS, corrected by gender\n") )
  m = glm(test == cohort1 ~ quant + gender, family = binomial(link='logit'),
data=data.test)
```

```

dump.model( m )
if ( verbose ) {
  print(summary(m))
}
cat( sprintf( "Test the PRS, corrected by age\n" ) )
m = glm(test == cohort1 ~ quant + age.test, family = binomial(link='logit'),
data=data.test)
res = try( dump.model( m), silent = T )
if(inherits(res, "try-error")) {
  print( "Could not get CI when Age is included into the model")
}
if ( verbose ) {
  print(summary(m))
}
cat( sprintf( "Test the PRS corrected by gender and age model\n" ) )
m = glm(test == cohort1 ~ quant + gender + age.test, family =
binomial(link='logit'), data=data.test)
res = try( dump.model( m), silent = T )
if(inherits(res, "try-error")) {
  print( "Could not get CI when sex and Age is included into the model")
}
if ( verbose ) {
  print(summary(m))
}
#Uncomment these if interested in looking at APOE score effect separated from the
main PRS
#cat( sprintf( "Test the GRS + gender + APOE Score model %s vs. %s\n", cohort1,
cohort2) )
#m = glm(test == cohort1 ~ quant + gender + APOE_Score, family =
binomial(link='logit'), data=data.test)
#dump.model( m )
#cat( sprintf( "Test the GRS + gender + age + APOE Score model %s vs. %s\n",
cohort1, cohort2) )
#m = glm(test == cohort1 ~ quant + gender + age.test + APOE_Score, family =
binomial(link='logit'), data=data.test)
#dump.model( m )
#print(summary(m))
}

```

```

#Auxiliary function to dump the results of the logistic regressions in the test.GRS
function

```

```

dump.model = function ( m ) {
  s = summary( m )
  coeff = s$coefficients
  ci = suppressMessages( exp( confint(m) ) )
  cat( sprintf( "Odd\t2.5%\t97.5%\tp-value\n" ) )
  for ( i in 2:dim( coeff )[1] ) {
    var.name=rownames(coeff ) [i]
    cat( sprintf( "%f\t%f\t%f\t%e\t%s\n", exp( coeff[i,1]), ci[i,1], ci[i,2],
coeff[i,4], var.name) )
  }
  cat("")
}

```

```

#ORDdiff: determine the significance of differences between the OR of alternative
regression models.

```

```

# Parameters:
# OR1 odds ratios (not log odds) of the first model
# OR2 odds ratios (not log odds) of the second model
# SE1 Standard Errors from the model 1
# SE2 Standard Errors from the model 2

```

```

# Returns: Evaluation of the statistical significance of the OR (p-value)

ORdiff <- function(OR1,OR2,SE1,SE2){
  odds1 <- OR1
  odds2 <- OR2
  sterr1 <- SE1
  sterr2 <- SE2
  absdiff <- abs(odds1 - odds2)
  delta <- sqrt(sterr1^2 + sterr2^2)
  Z <- absdiff/delta
  diffpval <- 2*(1-pnorm(Z))
  return(diffpval)
}

#Build toy dataset
toy.db = data.frame(
  cohort = c ( rep( "Control", 1000), rep( "sEOAD", 500), rep( "sLOAD", 1500) ),
  gender = sample( c(0,1), size = 3000, replace = T),
  age.test = c( sample( 65:85, size=1000, replace = T), sample( 55:64, size=500,
replace = T), sample( 65:85, size=1500, replace = T) ),
  PRS = c( runif( 1000, 1, 5 ), runif( 500, 1.2, 5.5 ), runif( 1500, 1, 5.5) ),
  PRS_APOE = c( runif( 1000, 0, 7 ), runif( 500, 1.2, 10 ), runif( 1500, 0, 9) ),
  stringsAsFactors = F
)

#Examples:
#Compares sEOAD vs Contols, using the PRS (modell)
#Should not return any meaningful results when age (colinearity) is added
test.GRS(toy.db, "cohort", "sEOAD", "Control", "PRS", verbose = F)
#Compares sLOAD vs Contols, using the PRS (modell)
test.GRS(toy.db, "cohort", "sLOAD", "Control", "PRS", verbose = F)

#Compares sEOAD vs Contols, using the PRS with APOE effects (model2)
#Should not return any meaningful results when age (colinearity) is added
test.GRS(toy.db, "cohort", "sEOAD", "Control", "PRS_APOE", verbose = F)
#Compares sLOAD vs Contols, using the PRS with APOE effects (model2)
test.GRS(toy.db, "cohort", "sLOAD", "Control", "PRS_APOE", verbose = F)

#The eADAD are analyzed differently:
toy.db.eadad = data.frame(
  cohort = c ( rep( "Control", 1000), rep( "fADAD", 150)),
  gender = sample( c(0,1), size = 1150, replace = T),
  age.test = c( sample( 65:85, size=1000, replace = T), sample( 42:55, size=150,
replace = T)),
  FID = c(rep( 0, 1000), sample( 1:45, 150, replace = T)),
  PRS = c( runif( 1000, 1, 5 ), runif( 150, 1, 5)),
  PRS_APOE = c( runif( 1000, 1.5, 7 ), runif( 150, 1.9, 7.9)),
  stringsAsFactors = F
)
library( lme4)
library( test.lme )
#Test the association for the PRS (model 1), only correcting for gender
fm2 <- glmer(cohort == "fADAD" ~ PRS + gender + (1 | FID), toy.db.eadad,
family=binomial() )
summary(fm2)
#confint( fm2) #can take a while
#Test the association for the PRS and APOE effects (model 2), only correcting for
gender
fm2 <- glmer(cohort == "fADAD" ~ PRS_APOE + (1 | FID), toy.db.eadad,
family=binomial() )
summary(fm2)
#confint( fm2) #can take a while

```
